# Supplementary material
Source: PubMed Central journal article supplement (PMC3099252)
Supplement: NIHMS287112-supplement-1_si_001.pdf [file NIHMS287112-supplement-1_si_001.pdf]

## Supporting information

# Advancing Matrix-Assisted Laser Desorption/Ionization Mass Spectrometric Imaging for Capillary Electrophoresis Analysis of Peptides

Junhua Wang,<sup>†</sup> Hui Ye,<sup>†</sup> Zichuan Zhang,<sup>†</sup> Feng Xiang,<sup>†</sup> Gary Girdaukas,<sup>†</sup> and Lingjun Li<sup>\*,†,‡</sup>

*School of Pharmacy, University of Wisconsin-Madison, 777 Highland Avenue, Madison, Wisconsin 53705, and Department of Chemistry, University of Wisconsin-Madison, 1101 University Avenue, Madison, Wisconsin 53706*

E-mail: [lli@pharmacy.wisc.edu](mailto:lli@pharmacy.wisc.edu)

|                |      |
|----------------|------|
| Figure S1..... | P2   |
| Figure S2..... | P3-6 |
| Figure S3..... | P7-8 |
| Table S1.....  | P9   |
| Table S2.....  | P10  |

---

\* To whom correspondence should be addressed. Tel: (608) 265-8491, Fax: (608) 262-5345.

<sup>†</sup> School of Pharmacy, University of Wisconsin-Madison

<sup>‡</sup> Department of Chemistry, University of Wisconsin-Madison

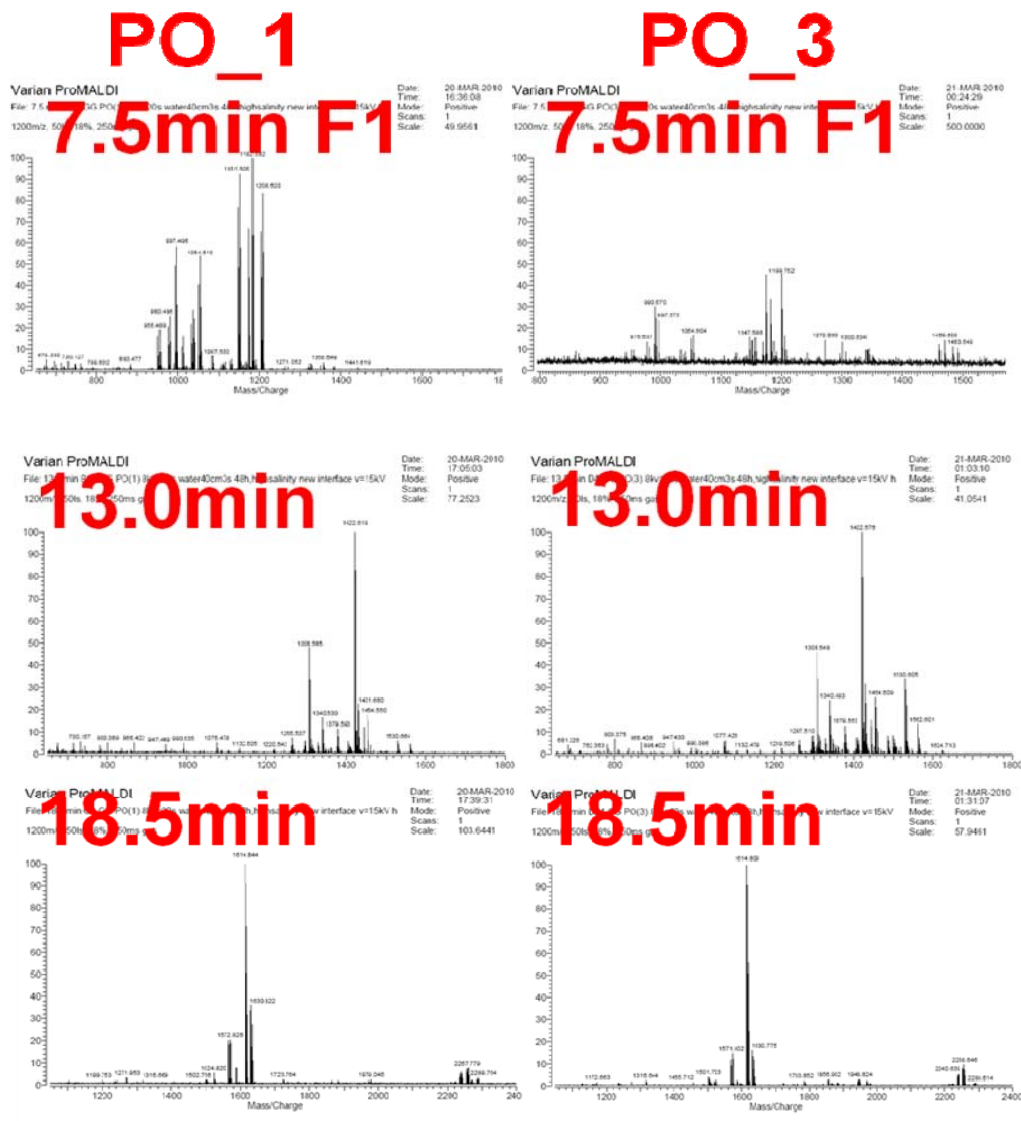

**Figure S1.** The biological replicates of two blue crab pericardial organ (PO) tissue extracts by off-line CE-MALDI-FT-MS analysis using the improved interface (spectra at beginning deposition time=7.5 min, middle time=13 min, and ending time=18.5 min for PO\_1 (left) and PO\_3 (right) samples). The peak intensities vary but the profiles are similar. The spectra demonstrate reproducible separations for extremely complex mixtures of biological replicates, verifying the good reproducibility of the new CE-MALDI MS interface.

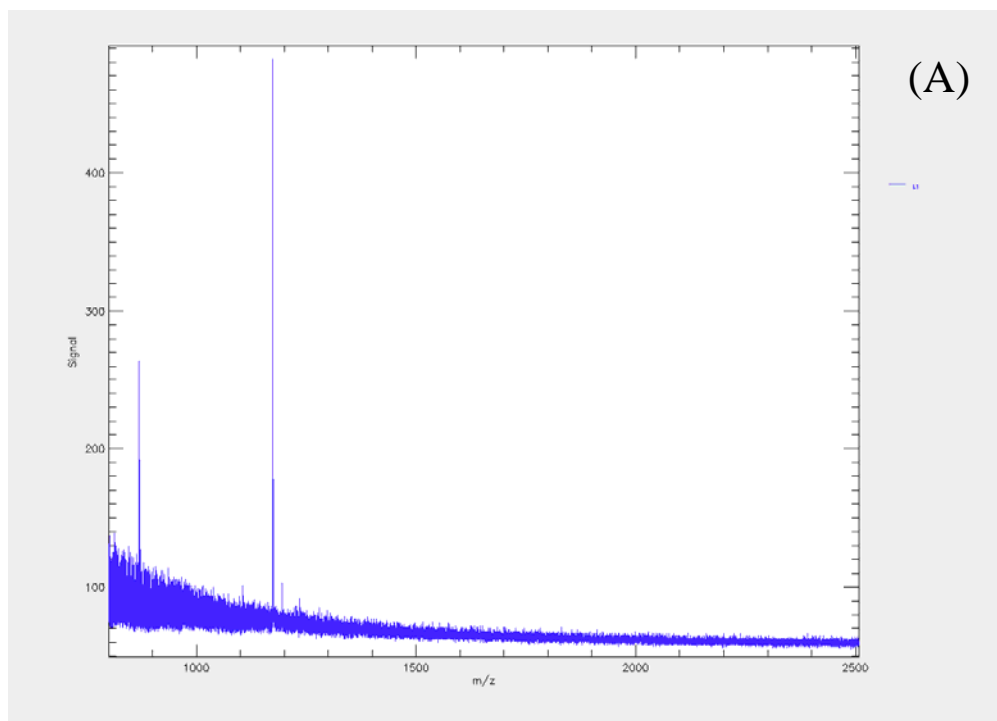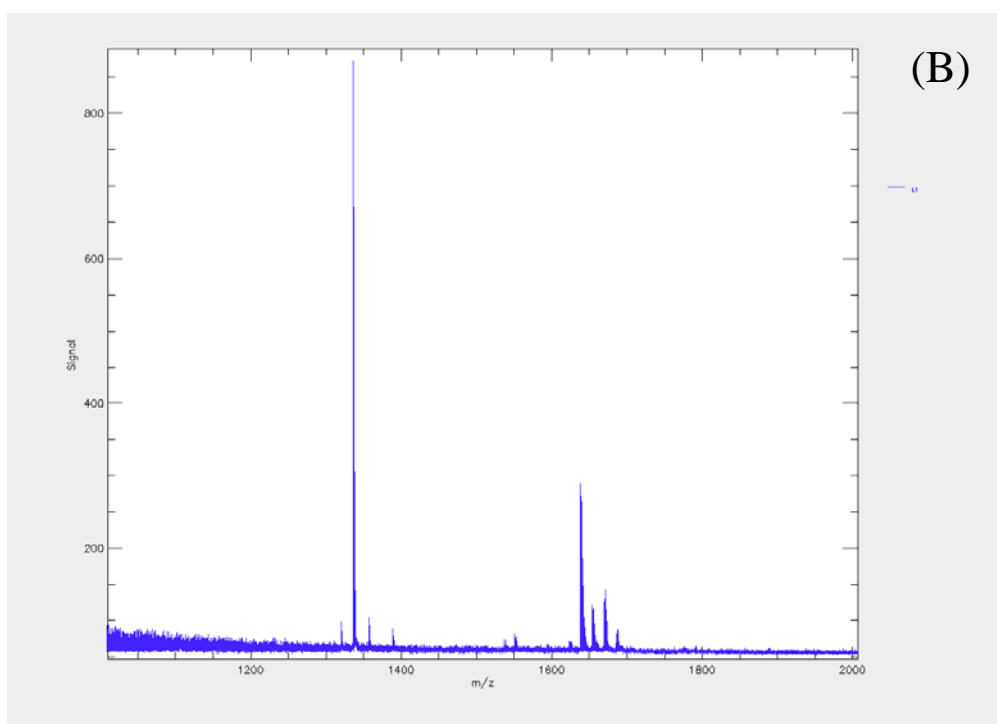

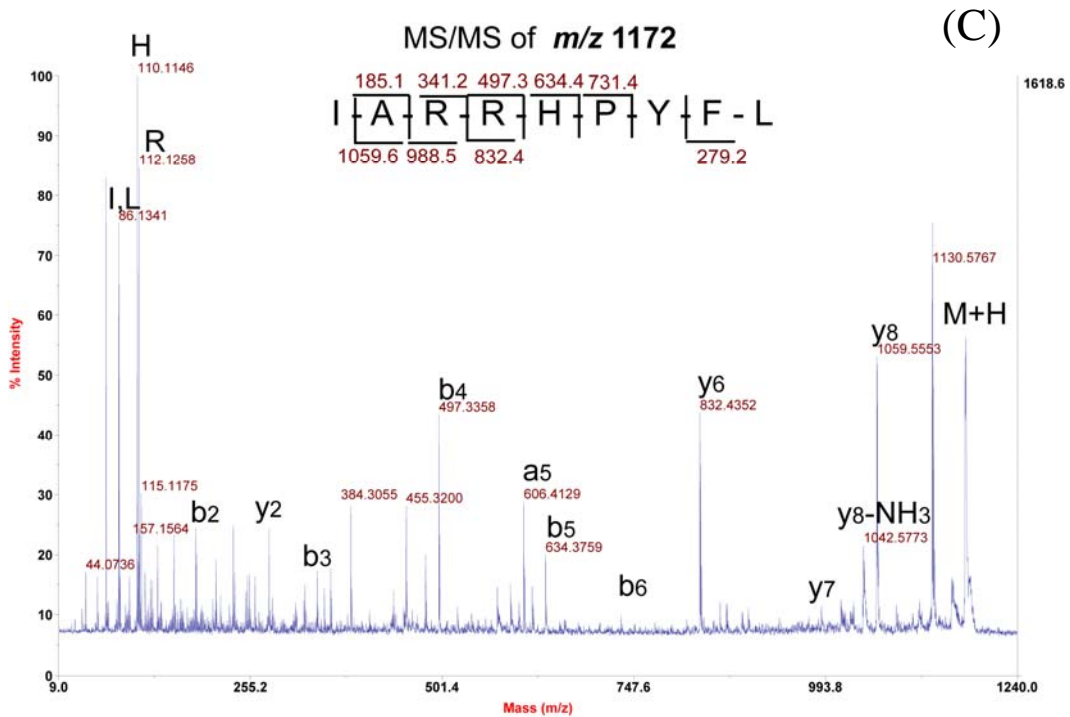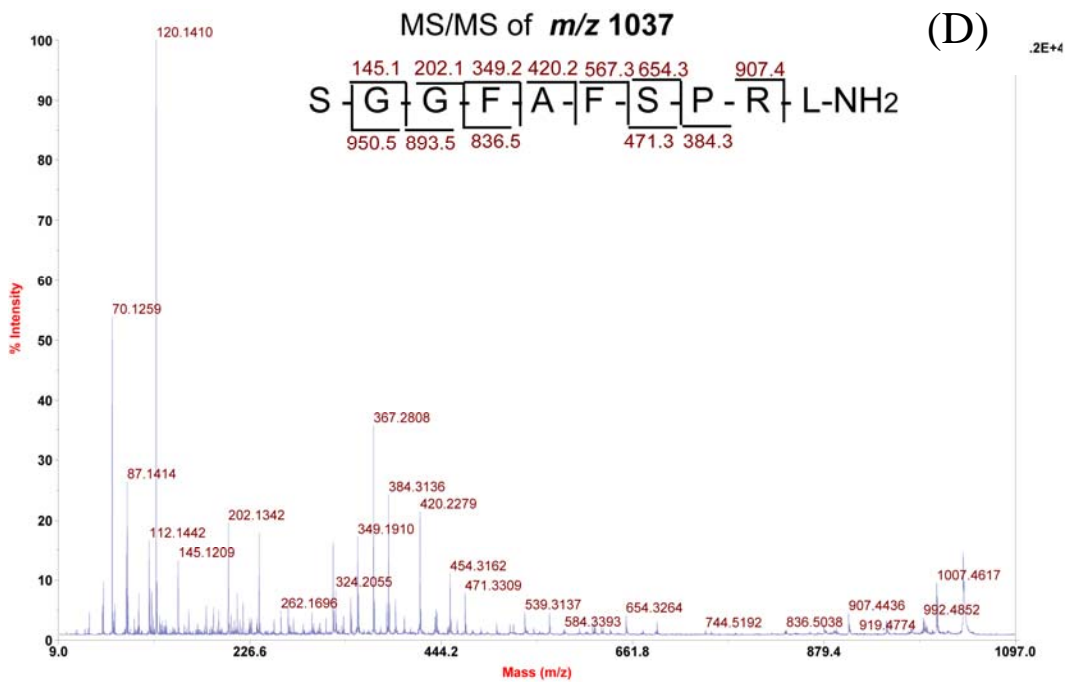

MS/MS of *m/z* 1084

(E)

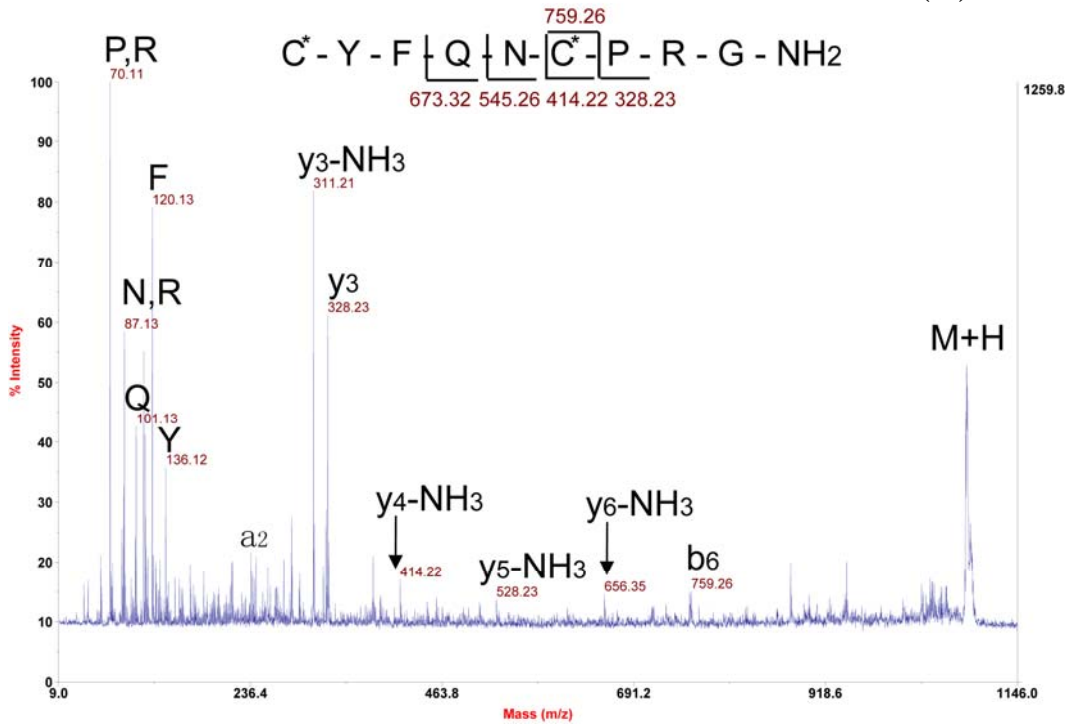

MS/MS of *m/z* 1335

(F)

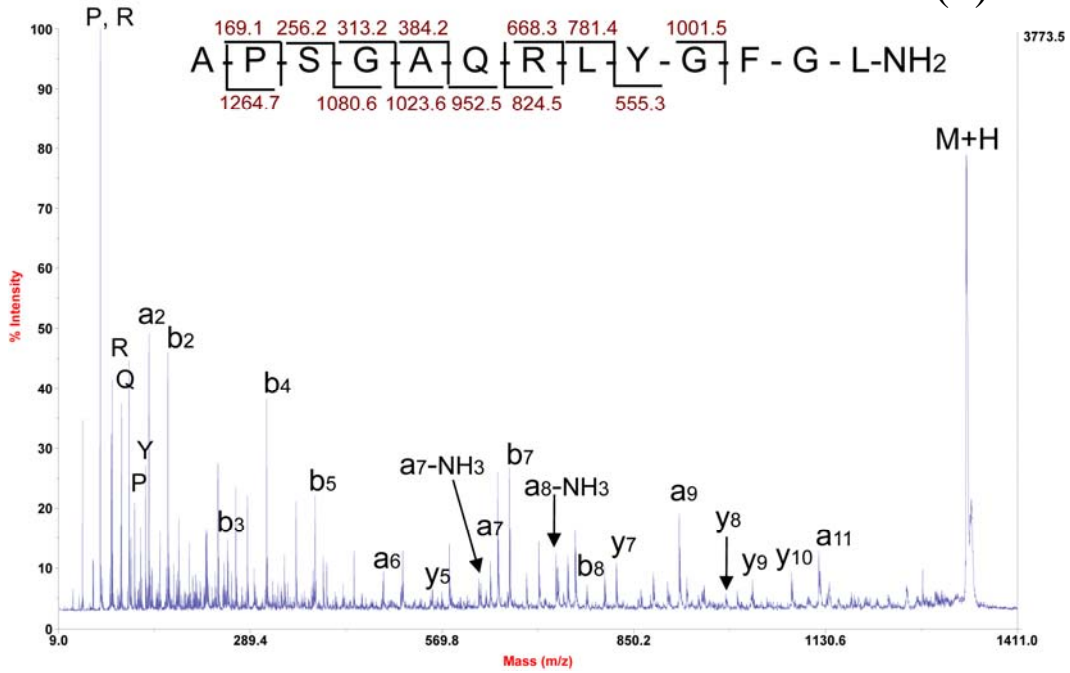

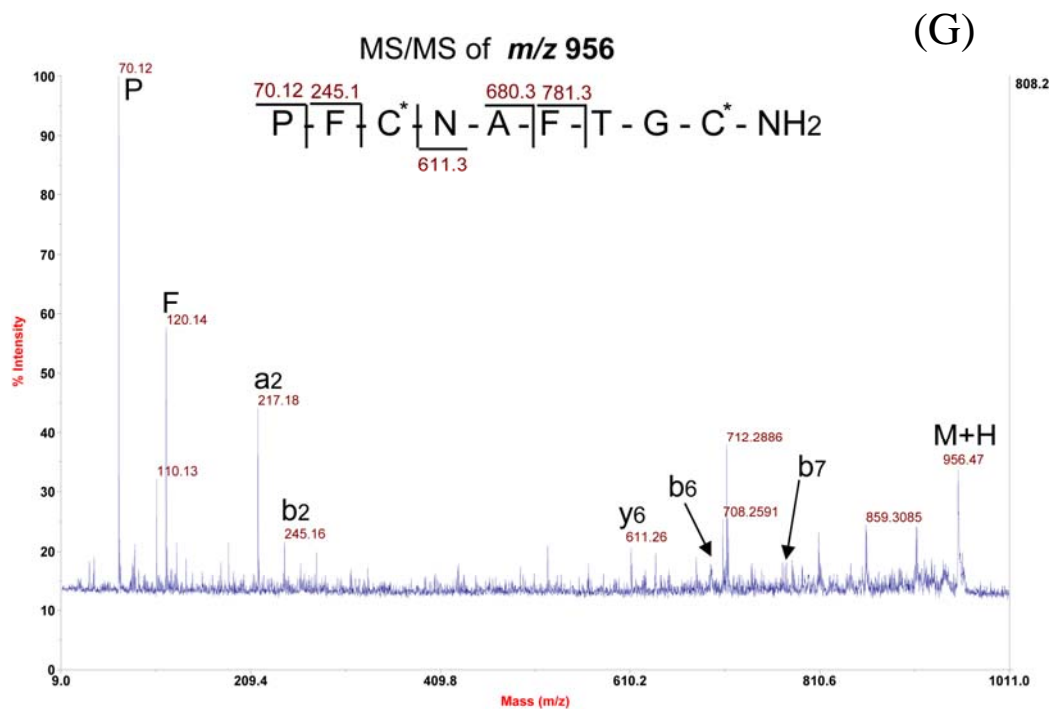

**Figure S2.** CE-MALDI TOF/TOF mass spectral analysis of a peptide mixture.

(A-B) Representative MALDI-TOF/TOF mass spectra showing the isolation of peptides by CE in **Figure 3**. A= ( $m/z$  1172 (peak 2), eluted at 517.5 s, pixel info: x=259, y=1); B= ( $m/z$  1335 (peak 5) and  $m/z$  1637 (peak 6) co-eluted at 612.5 s, pixel info: x=372, y=1).

(C-G) MS/MS spectral identification of peptide sequences based on the fragmentation pattern matching.

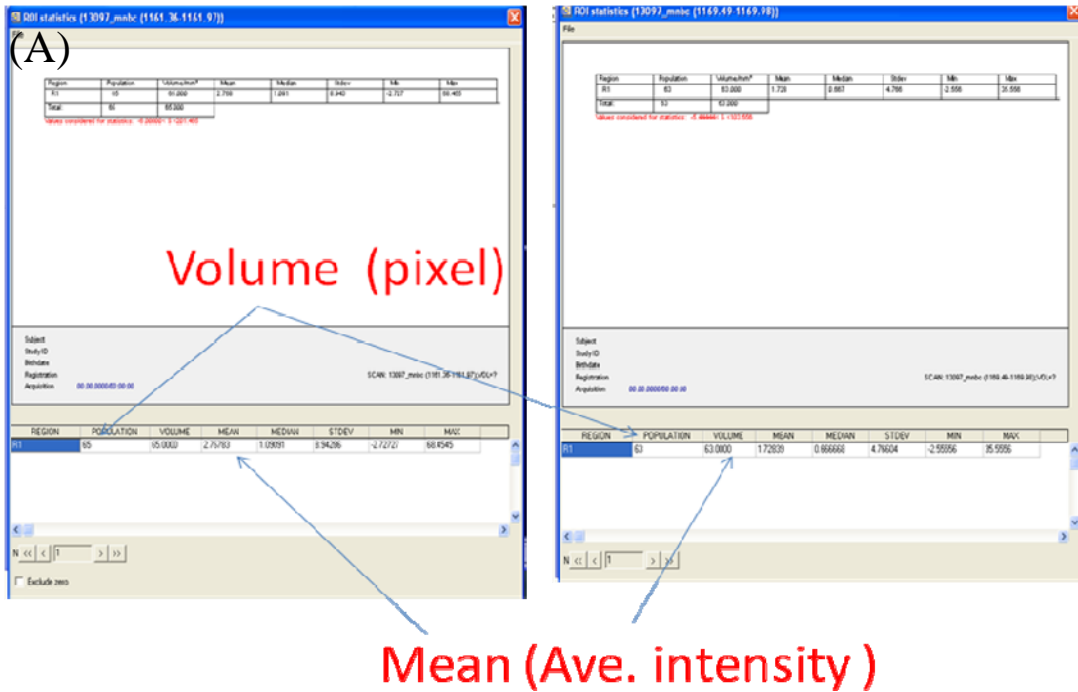

**m/z 1161**  
 $65 \times 2.77 = 180$

**m/z 1169**  
 $63 \times 1.73 = 108$

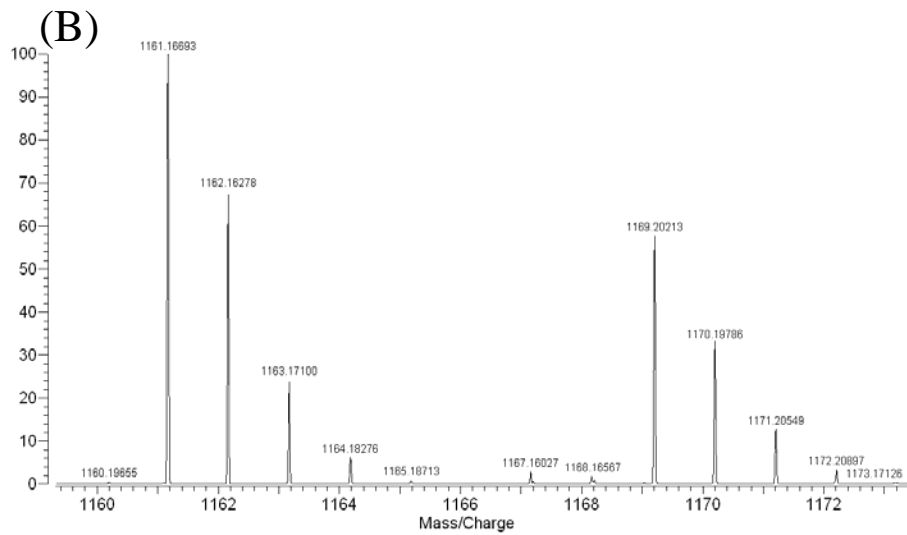

ProMALDI  
 sp mix (2 to 1).trans  
 30s 1200m/z

Date: 05-OCT-1  
 Time: 17:02:34  
 Mode: Positive  
 Scans: 1  
 Scale: 8.6416

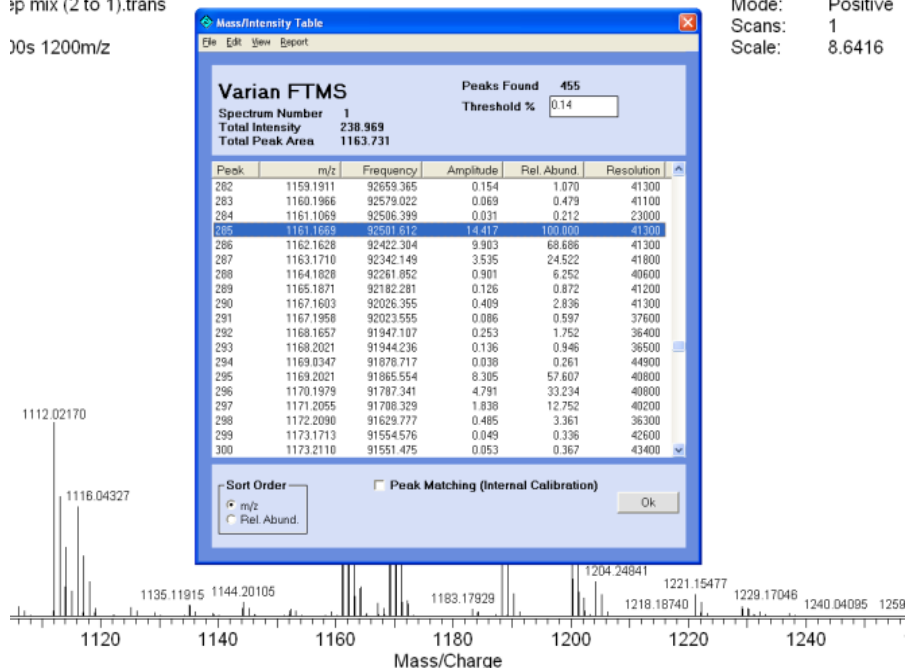

**Figure S3.** Relative quantitation of peptide abundances by CE-MALDI MS.

(A) Region of interest (ROI) table of the peaks at  $m/z$  1161 and  $m/z$  1169, originating from peptide GAHKNYLRF ( $m/z$  1105.59, peak 3 in **Figure 4**). The ROIs were carefully aligned with each other ( $\pm 1$  pixel). The “volume” (or “population”) by “means” in these two areas are used to represent the total intensities of the extracted ions from the two peaks. The intensity for  $m/z$  1161 is 180, for  $m/z$  1169 is 108 and the calculated ratio is 1.67.

(B) The MALDI-FTMS spectrum showing the experimental ratio of peaks  $m/z$  1161/1169, and the ratio is calculated to be 1.75 according to peak amplitudes (intensities). This value correlates well with the imaging data. Both are 10%-15% below the theoretical ratio of 2:1.



From Figure 3, the migration order nicely follows the equation of  $q/M^{1/2}$ ,<sup>3</sup> which is proportional to their net charges (q), and inversely proportional to the square root of their masses (M). The peptides' net charges are calculated based on the Henderson-Hasselbalch equation via the website

<http://www.innovagen.se/custom-peptide-synthesis/peptide-property-calculator/peptide-property-calculator-notes.asp>, as given in **Table S1**.

**Table S1.** The identities, sequences, net charges, and concentrations of the peptide peaks in **Figure 3**.

| Peak ID | <i>m/z</i> | sequence          | Net charge | Conc.                  |
|---------|------------|-------------------|------------|------------------------|
| 1       | 1105.59    | GAHKNYLRF         | +3         | 7.0*10 <sup>-7</sup> M |
| 2       | 1172.67    | IARRHPYFL         | +2.8       | 7.5*10 <sup>-7</sup> M |
| 3       | 1037.55    | SGGFAFSPRLamide   | +2         | 6.5*10 <sup>-7</sup> M |
| 4       | 1084.45    | CYFQNCPRGamide    | +2         | 3.7*10 <sup>-7</sup> M |
| 5       | 1335.72    | APSGAQRLYGFGamide | +2         | 2.5*10 <sup>-7</sup> M |
| 6       | 1637.72    | AGCKNFFWKTFTSC    | +2         | 5.5*10 <sup>-7</sup> M |
| 7       | 956.37     | PFCNAFTGCamide    | +1         | 5.0*10 <sup>-7</sup> M |

Net charge calculation via (at pH 4.9)

<http://innovagen.net/custom-peptide-synthesis/peptide-property-calculator/peptide-property-calculator.asp>

**Table S2.** Experimental ratios of the isotopically labeled peptides observed from the CE-MALDI imaging area, the ratios vary from 1.67 to 2.27.

| <b>Peak ID</b>         | <b>+ light</b> | <b>+ heavy</b> | <b>ROI ratio<br/>Light/heavy</b> | <b>Mass shift</b> | <b>Label site(s)</b> |
|------------------------|----------------|----------------|----------------------------------|-------------------|----------------------|
| (1) <i>m/z</i> 599.31  | 627            | 631            | 1.926                            | +28/32            | N-terminal           |
| (2) <i>m/z</i> 784.41  | 812            | 816            | 2.268                            | +28/32            | N-terminal           |
| (3) <i>m/z</i> 1105.59 | 1161           | 1169           | 1.673                            | +56/64            | N-terminal & K       |
| (4) <i>m/z</i> 976.46  | 1004           | 1008           | 1.727                            | +28/32            | N-terminal           |
| (5) <i>m/z</i> 1335.72 | 1363           | 1367           | 1.862                            | +28/32            | N-terminal           |
| (6) <i>m/z</i> 1282.67 | 1310           | 1314           | 1.965                            | +28/32            | N-terminal           |
| (7) <i>m/z</i> 1046.54 | 1074           | 1078           | 2.156                            | +28/32            | N-terminal           |
| (8) <i>m/z</i> 1104.64 | 1188           | 1200           | 2.211                            | +84/96            | N-terminal & K ×2    |
| (9) <i>m/z</i> 1067.56 | 1095           | 1099           | 1.727                            | +28/32            | N-terminal           |
| (10) <i>m/z</i> 689.36 | 745            | 753            | 2.227                            | +56/64            | N-terminal & K       |
